# Supplementary material for: Constrained crystals deep convolutional generative adversarial network for the inverse design of crystal structures
Source: Springer Nature journal article supplement (doi:10.1038/s41524-021-00526-4), 2021-05-10
Supplement: 41524_2021_526_MOESM1_ESM.pdf [file 41524_2021_526_MOESM1_ESM.pdf]

## Supplementary Figures

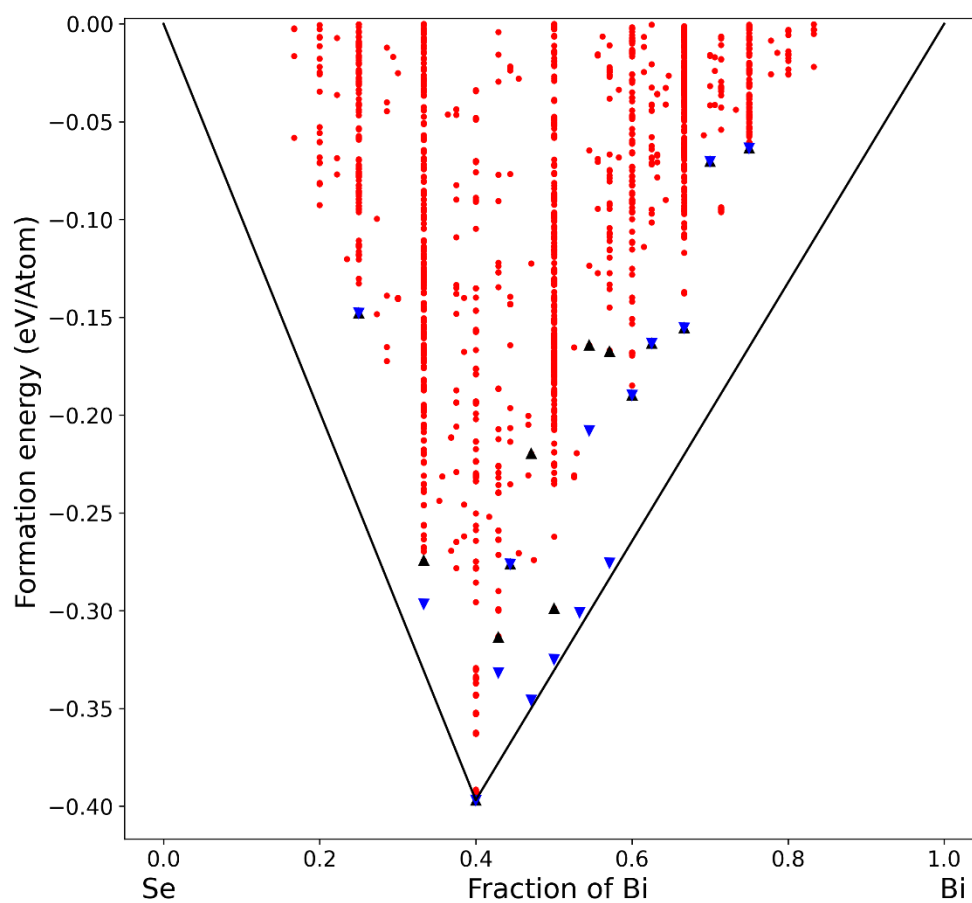

Supplementary Figure 1. Convex hull of Bi-Se system, where the black line represents the convex hull, red points are the structures, blue triangles are the experimentally achievable phases, black triangles are the corresponding structures in the MP database.

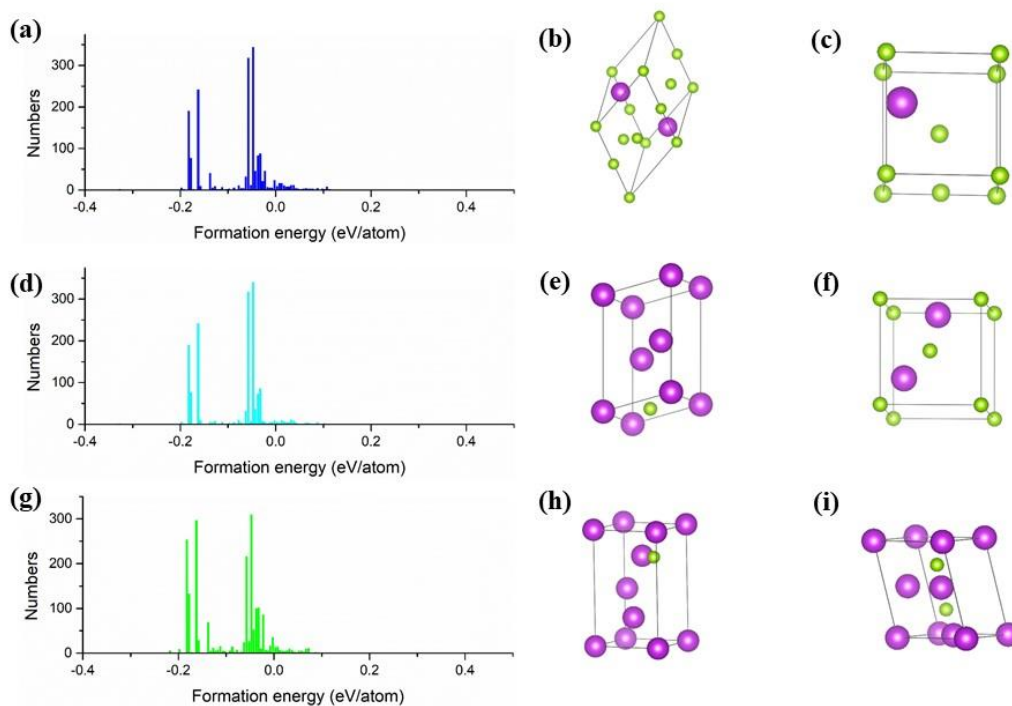

Supplementary Figure 2. Distribution and structures of generated data. (a) Distribution of formation energy of DCGAN generated data, where the size of bin is 5 meV; (b) crystal structure of generated  $\text{Bi}_2\text{Se}_4$ ; (c) crystal structure of generated  $\text{Bi}_1\text{Se}_3$ ; (d) Distribution of formation energy of DCGAN + constraint generated data, where the size of bin is 5 meV; (e) crystal structure of generated  $\text{Bi}_3\text{Se}_1$ ; (f) crystal structure of generated  $\text{Bi}_2\text{Se}_2$ ; (g) Distribution of formation energy of CCDCGAN generated data, where the size of bin is 5 meV; (h) crystal structure of generated  $\text{Bi}_4\text{Se}_1$ ; (i) crystal structure of generated  $\text{Bi}_4\text{Se}_2$ .

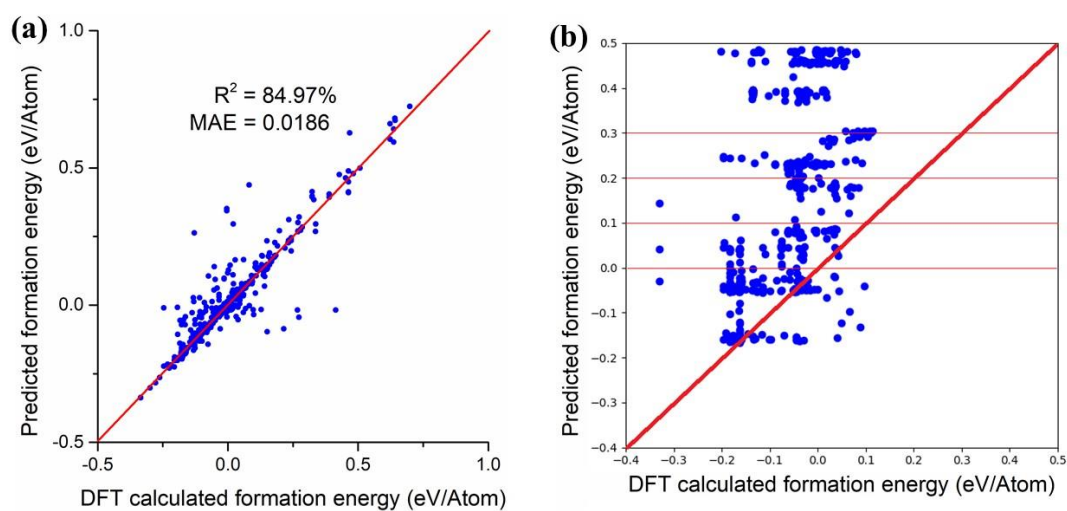

Supplementary Figure 3. Comparison of formation energy. (a) DFT calculated formation energy vs predicted formation energy for test set of original database; (b) Predicted formation energy of generated structures by DCGAN before structure relaxation vs their corresponding formation energy after relaxation.

## Supplementary Tables

Supplementary Table 1. Design of sites autoencoder.

| Model type | Layer type     | Stride | Activation     | Padding | Input size | Output size |
|------------|----------------|--------|----------------|---------|------------|-------------|
| Encoder    | 3D Convolution | 2,2,2  | LeakyRELU(0.2) | SAME    | 64,64,64   | 32,32,32    |
|            | 3D Convolution | 2,2,2  | LeakyRELU(0.2) | SAME    | 32,32,32   | 16,16,16    |
|            | 3D Convolution | 2,2,2  | LeakyRELU(0.2) | SAME    | 16,16,16   | 8,8,8       |
|            | 3D Convolution | 2,2,2  | LeakyRELU(0.2) | SAME    | 8,8,8      | 4,4,4       |
|            | 3D Convolution | 1,1,1  | tanh           | VALID   | 4,4,4      | 200         |
| Decoder    | 3D Convolution |        | LeakyRELU(0.2) | VALID   | 200        | 4,4,4       |
|            | 3D Convolution |        | LeakyRELU(0.2) | SAME    | 4,4,4      | 8,8,8       |
|            | 3D Convolution |        | LeakyRELU(0.2) | SAME    | 8,8,8      | 16,16,16    |
|            | 3D Convolution |        | LeakyRELU(0.2) | SAME    | 16,16,16   | 32,32,32    |
|            | 3D Convolution |        | sigmoid        | SAME    | 32,32,32   | 64,64,64    |

Supplementary Table 2. Design of lattice autoencoder.

| Model type | Layer type     | Stride | Activation     | Padding | Input size | Output size |
|------------|----------------|--------|----------------|---------|------------|-------------|
| Encoder    | 3D Convolution | 2,2,2  | LeakyRELU(0.2) | SAME    | 32,32,32   | 16,16,16    |
|            | 3D Convolution | 2,2,2  | LeakyRELU(0.2) | SAME    | 16,16,16   | 8,8,8       |
|            | 3D Convolution | 2,2,2  | LeakyRELU(0.2) | SAME    | 8,8,8      | 4,4,4       |
|            | 3D Convolution | 1,1,1  | tanh           | VALID   | 4,4,4      | 200         |
| Decoder    | 3D Convolution |        | LeakyRELU(0.2) | VALID   | 200        | 4,4,4       |
|            | 3D Convolution |        | LeakyRELU(0.2) | SAME    | 4,4,4      | 8,8,8       |
|            | 3D Convolution |        | LeakyRELU(0.2) | SAME    | 8,8,8      | 16,16,16    |
|            | 3D Convolution |        | sigmoid        | SAME    | 16,16,16   | 32,32,32    |

Supplementary Table 3. Design of generator.

| Layer type                | Stride | Activation | Padding | Input size | Output size |
|---------------------------|--------|------------|---------|------------|-------------|
| Fully connected           |        | RELU       |         | 200        | 7,7,128     |
| 2D Convolution            |        | RELU       | SAME    | 7,7,128    | 14,14,128   |
| BatchNormalllization(0.8) |        |            |         | 14,14,128  | 14,14,128   |
| 2D Convolution            |        | RELU       | SAME    | 14,14,128  | 28,28,128   |
| 2D Convolution            |        | RELU       | SAME    | 28,28,128  | 28,28,64    |
| BatchNormalllization(0.8) |        |            |         | 28,28,64   | 28,28,64    |
| 2D Convolution            |        | tanh       | SAME    | 28,28,64   | 28,28,1     |

Supplementary Table 4. Design of discriminator.

| Layer type                   | Strid<br>e | Activation         | Padding     | Input<br>size | Output<br>size |
|------------------------------|------------|--------------------|-------------|---------------|----------------|
| 2D Convolution               | 2,2        | LeakyRELU(0.<br>2) | SAME        | 28,28,1       | 14,14,3<br>2   |
| Dropout(0.25)                |            |                    |             | 14,14,3<br>2  | 14,14,3<br>2   |
| 2D Convolution               | 2,2        | LeakyRELU(0.<br>2) | PADDIN<br>G | 14,14,3<br>2  | 8,8,64         |
| BatchNormallization(0.<br>8) |            |                    |             | 8,8,64        | 8,8,64         |
| Dropout(0.25)                |            |                    |             | 8,8,64        | 8,8,64         |
| 2D Convolution               | 2,2        | LeakyRELU(0.<br>2) | SAME        | 8,8,64        | 4,4,128        |
| BatchNormallization(0.<br>8) |            |                    |             | 4,4,128       | 4,4,128        |
| Dropout(0.25)                |            |                    |             | 4,4,128       | 4,4,128        |
| 2D Convolution               | 1,1        | LeakyRELU(0.<br>2) | SAME        | 4,4,128       | 4,4,256        |
| BatchNormallization(0.<br>8) |            |                    |             | 4,4,256       | 4,4,256        |
| Dropout(0.25)                |            |                    |             | 4,4,256       | 4,4,256        |
| Flatten                      |            |                    |             | 4,4,256       | 4096           |
| Fully connected              |            | sgimoid            |             | 4096          | 1              |

Supplementary Table 5. Design of constraint model.

| Layer type                   | Strid<br>e | Activation         | Padding     | Input<br>size | Output<br>size |
|------------------------------|------------|--------------------|-------------|---------------|----------------|
| 2D Convolution               | 2,2        | LeakyRELU(0.<br>2) | SAME        | 28,28,1       | 14,14,3<br>2   |
| Dropout(0.25)                |            |                    |             | 14,14,3<br>2  | 14,14,3<br>2   |
| 2D Convolution               | 2,2        | LeakyRELU(0.<br>2) | PADDIN<br>G | 14,14,3<br>2  | 8,8,64         |
| BatchNormallization(0.<br>8) |            |                    |             | 8,8,64        | 8,8,64         |
| Dropout(0.25)                |            |                    |             | 8,8,64        | 8,8,64         |
| 2D Convolution               | 2,2        | LeakyRELU(0.<br>2) | SAME        | 8,8,64        | 4,4,128        |
| BatchNormallization(0.<br>8) |            |                    |             | 4,4,128       | 4,4,128        |
| Dropout(0.25)                |            |                    |             | 4,4,128       | 4,4,128        |
| 2D Convolution               | 1,1        | LeakyRELU(0.<br>2) | SAME        | 4,4,128       | 4,4,256        |
| BatchNormallization(0.<br>8) |            |                    |             | 4,4,256       | 4,4,256        |
| Dropout(0.25)                |            |                    |             | 4,4,256       | 4,4,256        |
| Flatten                      |            |                    |             | 4,4,256       | 4096           |
| Fully connected              |            | LeakyRELU(0.<br>2) |             | 4096          | 1024           |
| Fully connected              |            | LeakyRELU(0.<br>2) |             | 1024          | 256            |
| Fully connected              |            | LeakyRELU(0.<br>2) |             | 256           | 256            |
| Fully connected              |            | LeakyRELU(0.<br>2) |             | 256           | 256            |
| Fully connected              |            | LeakyRELU(0.<br>2) |             | 256           | 64             |
| Fully connected              |            | LeakyRELU(0.<br>2) |             | 64            | 1              |

Table Supplementary 6. Generated distinct structures.

| ID                     | Formula                  | Formation energy (eV/atom) | Convex hull (eV/atom) | Structure                                                                            | Space group # |
|------------------------|--------------------------|----------------------------|-----------------------|--------------------------------------------------------------------------------------|---------------|
| DCGAN<br>Epoch_11731   | $\text{Bi}_4\text{Se}_2$ | -0.1391                    | 0.0798                | 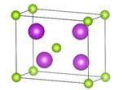   | 141           |
| DCGAN<br>Epoch_2368    | $\text{Bi}_2\text{Se}_4$ | -0.2481                    | 0.0803                |    | 12            |
| DCGAN<br>Epoch_1651    | $\text{Bi}_2\text{Se}_4$ | -0.2447                    | 0.0837                |    | 2             |
| DCGAN<br>Epoch_1343    | $\text{Bi}_5\text{Se}_1$ | -0.021                     | 0.0893                |    | 8             |
| DCGAN<br>Epoch_876     | $\text{Bi}_6\text{Se}_2$ | -0.066                     | 0.0981                |    | 12            |
| DCGAN<br>Epoch_7598    | $\text{Bi}_4\text{Se}_2$ | -0.1201                    | 0.0988                |   | 8             |
| CCDCGAN<br>Epoch_315   | $\text{Bi}_2\text{Se}_4$ | -0.2871                    | 0.0413                |  | 2             |
| CCDCGAN<br>Epoch_8688  | $\text{Bi}_4\text{Se}_2$ | -0.1394                    | 0.0795                |  | 141           |
| CCDCGAN<br>Epoch_12310 | $\text{Bi}_6\text{Se}_3$ | -0.1314                    | 0.0876                |  | 1             |
| CCDCGAN<br>Epoch_4803  | $\text{Bi}_4\text{Se}_2$ | -0.1258                    | 0.0931                |  | 10            |
| CCDCGAN<br>Epoch_9982  | $\text{Bi}_6\text{Se}_3$ | -0.1214                    | 0.0975                |  | 1             |



Table Supplementary 7. Compilation of the experimentally achievable (EXP) phases and the corresponding generated phases (CCDCGAN) of the binary Bi-Se system. The fifth column shows the formation energy of the structures with corresponding compositions included in the training. <sup>1</sup>

| Phase                           | Composition<br>% of Bi | Formation<br>energy<br>(EXP)<br>(eV/atom) | Distance to<br>the convex<br>hull (EXP)<br>(eV/atom) | Formation<br>energy<br>(training)<br>(eV/atom) | Formation<br>energy<br>(CCDCGAN)<br>(eV/atom) |
|---------------------------------|------------------------|-------------------------------------------|------------------------------------------------------|------------------------------------------------|-----------------------------------------------|
| BiSe <sub>3</sub>               | 0.25                   | -0.15                                     | 0.10                                                 | -0.15                                          | -0.15                                         |
| BiSe <sub>2</sub>               | 0.333                  | -0.30                                     | 0.03                                                 | -0.27                                          | -0.30                                         |
| Bi <sub>2</sub> Se <sub>3</sub> | 0.4                    | -0.39                                     | 0                                                    | -0.39                                          | -0.39                                         |
| Bi <sub>3</sub> Se <sub>4</sub> | 0.429                  | -0.33                                     | 0.06                                                 | -0.31                                          | -0.33                                         |
| Bi <sub>4</sub> Se <sub>5</sub> | 0.444                  | -0.28                                     | 0.09                                                 | -0.28                                          | -0.28                                         |
| Bi <sub>8</sub> Se <sub>9</sub> | 0.471                  | -0.35                                     | 0.01                                                 | -0.22                                          | -0.22                                         |
| BiSe                            | 0.5                    | -0.32                                     | 0.01                                                 | -0.30                                          | -0.30                                         |
| Bi <sub>8</sub> Se <sub>7</sub> | 0.533                  | -0.30                                     | 0.01                                                 | None                                           | -0.02                                         |
| Bi <sub>6</sub> Se <sub>5</sub> | 0.545                  | -0.21                                     | 0.13                                                 | -0.16                                          | -0.21                                         |
| Bi <sub>4</sub> Se <sub>3</sub> | 0.571                  | -0.28                                     | 0.01                                                 | -0.17                                          | -0.26                                         |
| Bi <sub>3</sub> Se <sub>2</sub> | 0.6                    | -0.19                                     | 0.07                                                 | -0.19                                          | -0.19                                         |
| Bi <sub>5</sub> Se <sub>3</sub> | 0.625                  | -0.16                                     | 0.08                                                 | -0.16                                          | -0.16                                         |
| Bi <sub>2</sub> Se              | 0.667                  | -0.16                                     | 0.08                                                 | -0.16                                          | -0.16                                         |
| Bi <sub>7</sub> Se <sub>3</sub> | 0.7                    | -0.07                                     | 0.13                                                 | -0.07                                          | -0.07                                         |
| Bi <sub>3</sub> Se              | 0.75                   | -0.07                                     | 0.10                                                 | -0.07                                          | -0.07                                         |

## Supplementary Discussion

Batch training is conducted for both sites autoencoder and lattice autoencoder, the batch size is 822 and 311 respectively, and the epoch used in training are 100 and 200 respectively. Exact model designs are listed in Supplementary Table 1 and 2. The generated vectors are resized into a  $28 \times 28$  2d graphs where the rest are padding zeros.

Batch training is conducted for DCGAN model, batch size is 128 and total epoch is 500000. Detailed model design is listed in Supplementary Table 3 and 4. The loss function used in the GAN model is “binary\_crossentropy”, generator loss is to minimize the entropy between 1 and generated structures, while the discriminator loss is to minimize the entropy between 1 and real structures.

Batch training is conducted for constraint model, batch size is 128 and total epoch is 2000. Detailed model design is listed in Supplementary Table 5.

The performance of constraint model is in Supplementary Figure 3 (a). In the DCGAN + constraint model, the selection criterion is 0.3 eV/atom. The selection is calculated for two reasons: first, the MAE of the model is not exactly 0, so cutting at 0 eV/atom is highly likely to drop some reasonable structures; second, DFT is highly likely to reduce the formation energy of generated structures through relaxation as Supplementary Figure 3 (b) demonstrates, so we select this number to balance these two factors. And the effects of constraint in the latent space are demonstrated in movie file Supplementary Movie 1.

All parameters and designs are the same as DCGAN, except the loss of generator, it is the combination of “binary\_crossentropy” and the average of generated structures predicted by the constraint.

## Supplementary Reference

1. *ASM handbook*. (ASM International, 1990).
